# Supplementary material for: Accurate estimation of microbial sequence diversity with Distanced
Source: Oxford University Press journal article supplement (doi:10.1093/bioinformatics/btz668), 2019-08-21
Supplement: bioinformatics_36_3_728_s7.zip [file bioinformatics_36_3_728_s7.zip]

Archive with 2 entries (2 files):
- Supplementary File for Online Publication.xlsx
- Supplementary File for Online Publication.pdf
