# Supplementary material for: Accurate estimation of microbial sequence diversity with Distanced
Source: Oxford University Press journal article supplement (doi:10.1093/bioinformatics/btz668), 2019-08-21
Supplement: bioinformatics_36_3_728_s7.zip [file bioinformatics_36_3_728_s7.zip › Supplementary File for Online Publication.xlsx]

## Sheet: Supplementary Table 1
Supplementary Table 1. Description of samples, parameters for merging reads with VSEARCH, and retention of reads during initial processing
Description of samples								Parameters for VSEARCH			Retention of reads
Sample number	Sequence type	Region	Sample type	Run or experiment	Source	Publication		fastq_minmergelena	fastq_maxmergelena		Forward and reverse readsb,c	Forward and reverse reads, primer-freed	Joined reads	Chimeras	Contaminants	Joined reads, filtered	Joined reads, filtered and truncated
											Number of reads
1	Antibody mRNA	NA	NA	SRX1589582	ncbi.nlm.nih.gov/sra	Khan et al. 2016. Sci Adv. 2:e1501371		409	443		520308	405805	309499	551	70	308878	308043
2	Antibody mRNA	NA	NA	SRX1589583	ncbi.nlm.nih.gov/sra	Khan et al. 2016. Sci Adv. 2:e1501371		409	443		651799	512797	399232	749	80	398403	397398
3	Antibody mRNA	NA	NA	SRX1589584	ncbi.nlm.nih.gov/sra	Khan et al. 2016. Sci Adv. 2:e1501371		409	443		607690	469184	349893	663	58	349172	348304
4	Antibody mRNA	NA	NA	SRX1589585	ncbi.nlm.nih.gov/sra	Khan et al. 2016. Sci Adv. 2:e1501371		409	443		695955	548907	426209	784	98	425327	424276
5	Antibody mRNA	NA	NA	SRX1589587	ncbi.nlm.nih.gov/sra	Khan et al. 2016. Sci Adv. 2:e1501371		409	443		659047	494025	380196	596	89	379511	378612
6	Bacterial 16S rDNA	V3-V4	Mock 1	130401	mothur.org/MiSeqDevelopmentData.html	Kozich et al. 2013. Appl Environ Microbiol. 79:5112-20		399	435		NA	602819	41605	1782	51	39772	39758
7	Bacterial 16S rDNA	V3-V4	Mock 1	130403	mothur.org/MiSeqDevelopmentData.html	Kozich et al. 2013. Appl Environ Microbiol. 79:5112-20		399	435		NA	613352	36434	1616	33	34785	34773
8	Bacterial 16S rDNA	V3-V4	Mock 1	130417	mothur.org/MiSeqDevelopmentData.html	Kozich et al. 2013. Appl Environ Microbiol. 79:5112-20		399	435		NA	534938	27691	1315	21	26355	26343
9	Bacterial 16S rDNA	V3-V4	Mock 1	130422	mothur.org/MiSeqDevelopmentData.html	Kozich et al. 2013. Appl Environ Microbiol. 79:5112-20		399	435		NA	469501	23543	1110	15	22418	22401
10	Bacterial 16S rDNA	V3-V4	Mock 2	130401	mothur.org/MiSeqDevelopmentData.html	Kozich et al. 2013. Appl Environ Microbiol. 79:5112-20		399	435		NA	613091	34421	2224	75	32122	32108
11	Bacterial 16S rDNA	V3-V4	Mock 2	130403	mothur.org/MiSeqDevelopmentData.html	Kozich et al. 2013. Appl Environ Microbiol. 79:5112-20		399	435		NA	627320	30972	2166	43	28763	28750
12	Bacterial 16S rDNA	V3-V4	Mock 2	130417	mothur.org/MiSeqDevelopmentData.html	Kozich et al. 2013. Appl Environ Microbiol. 79:5112-20		399	435		NA	552729	23877	1695	36	22146	22137
13	Bacterial 16S rDNA	V3-V4	Mock 2	130422	mothur.org/MiSeqDevelopmentData.html	Kozich et al. 2013. Appl Environ Microbiol. 79:5112-20		399	435		NA	481735	20520	1431	17	19072	19067
14	Bacterial 16S rDNA	V3-V4	Mock 3	130401	mothur.org/MiSeqDevelopmentData.html	Kozich et al. 2013. Appl Environ Microbiol. 79:5112-20		399	435		NA	1012097	23618	338	58	23222	23186
15	Bacterial 16S rDNA	V3-V4	Mock 3	130403	mothur.org/MiSeqDevelopmentData.html	Kozich et al. 2013. Appl Environ Microbiol. 79:5112-20		399	435		NA	1034938	22056	366	41	21649	21616
16	Bacterial 16S rDNA	V3-V4	Mock 3	130417	mothur.org/MiSeqDevelopmentData.html	Kozich et al. 2013. Appl Environ Microbiol. 79:5112-20		399	435		NA	899146	16845	215	21	16609	16585
17	Bacterial 16S rDNA	V3-V4	Mock 3	130422	mothur.org/MiSeqDevelopmentData.html	Kozich et al. 2013. Appl Environ Microbiol. 79:5112-20		399	435		NA	786991	15447	237	12	15198	15166
18	Bacterial 16S rDNA	V4	Human 1	130401	mothur.org/MiSeqDevelopmentData.html	Kozich et al. 2013. Appl Environ Microbiol. 79:5112-20		247	259		NA	782239	352750	14971	0	337779	337742
19	Bacterial 16S rDNA	V4	Human 1	130403	mothur.org/MiSeqDevelopmentData.html	Kozich et al. 2013. Appl Environ Microbiol. 79:5112-20		247	259		NA	740763	416018	18694	0	397324	397241
20	Bacterial 16S rDNA	V4	Human 1	130417	mothur.org/MiSeqDevelopmentData.html	Kozich et al. 2013. Appl Environ Microbiol. 79:5112-20		247	259		NA	627138	370431	15891	0	354540	354482
21	Bacterial 16S rDNA	V4	Human 1	130422	mothur.org/MiSeqDevelopmentData.html	Kozich et al. 2013. Appl Environ Microbiol. 79:5112-20		247	259		NA	521877	335483	15289	0	320194	320117
22	Bacterial 16S rDNA	V4	Human 2	130401	mothur.org/MiSeqDevelopmentData.html	Kozich et al. 2013. Appl Environ Microbiol. 79:5112-20		247	259		NA	1467113	491100	16493	0	474607	474551
23	Bacterial 16S rDNA	V4	Human 2	130403	mothur.org/MiSeqDevelopmentData.html	Kozich et al. 2013. Appl Environ Microbiol. 79:5112-20		247	259		NA	1348376	582076	20575	0	561501	561387
24	Bacterial 16S rDNA	V4	Human 2	130417	mothur.org/MiSeqDevelopmentData.html	Kozich et al. 2013. Appl Environ Microbiol. 79:5112-20		247	259		NA	1132522	522349	17603	0	504746	504642
25	Bacterial 16S rDNA	V4	Human 2	130422	mothur.org/MiSeqDevelopmentData.html	Kozich et al. 2013. Appl Environ Microbiol. 79:5112-20		247	259		NA	931732	470754	16758	0	453996	453886
26	Bacterial 16S rDNA	V4	Human 3	130401	mothur.org/MiSeqDevelopmentData.html	Kozich et al. 2013. Appl Environ Microbiol. 79:5112-20		247	259		NA	1260590	299934	16251	0	283683	283641
27	Bacterial 16S rDNA	V4	Human 3	130403	mothur.org/MiSeqDevelopmentData.html	Kozich et al. 2013. Appl Environ Microbiol. 79:5112-20		247	259		NA	1257496	392261	21943	0	370318	370245
28	Bacterial 16S rDNA	V4	Human 3	130417	mothur.org/MiSeqDevelopmentData.html	Kozich et al. 2013. Appl Environ Microbiol. 79:5112-20		247	259		NA	1059158	361199	20247	0	340952	340888
29	Bacterial 16S rDNA	V4	Human 3	130422	mothur.org/MiSeqDevelopmentData.html	Kozich et al. 2013. Appl Environ Microbiol. 79:5112-20		247	259		NA	898758	334007	19183	0	314824	314761
30	Bacterial 16S rDNA	V4	Mock 1	130401	mothur.org/MiSeqDevelopmentData.html	Kozich et al. 2013. Appl Environ Microbiol. 79:5112-20		247	259		NA	602819	184454	3181	1669	179604	179581
31	Bacterial 16S rDNA	V4	Mock 1	130403	mothur.org/MiSeqDevelopmentData.html	Kozich et al. 2013. Appl Environ Microbiol. 79:5112-20		247	259		NA	613352	226777	3994	2048	220735	220696
32	Bacterial 16S rDNA	V4	Mock 1	130417	mothur.org/MiSeqDevelopmentData.html	Kozich et al. 2013. Appl Environ Microbiol. 79:5112-20		247	259		NA	534938	207505	3528	1718	202259	202213
33	Bacterial 16S rDNA	V4	Mock 1	130422	mothur.org/MiSeqDevelopmentData.html	Kozich et al. 2013. Appl Environ Microbiol. 79:5112-20		247	259		NA	469501	196409	3488	1591	191330	191281
34	Bacterial 16S rDNA	V4	Mock 2	130401	mothur.org/MiSeqDevelopmentData.html	Kozich et al. 2013. Appl Environ Microbiol. 79:5112-20		247	259		NA	613091	138875	1546	2402	134927	134906
35	Bacterial 16S rDNA	V4	Mock 2	130403	mothur.org/MiSeqDevelopmentData.html	Kozich et al. 2013. Appl Environ Microbiol. 79:5112-20		247	259		NA	627320	172056	1989	2856	167211	167178
36	Bacterial 16S rDNA	V4	Mock 2	130417	mothur.org/MiSeqDevelopmentData.html	Kozich et al. 2013. Appl Environ Microbiol. 79:5112-20		247	259		NA	552729	161683	1879	2470	157334	157296
37	Bacterial 16S rDNA	V4	Mock 2	130422	mothur.org/MiSeqDevelopmentData.html	Kozich et al. 2013. Appl Environ Microbiol. 79:5112-20		247	259		NA	481735	151652	1812	2216	147624	147593
38	Bacterial 16S rDNA	V4	Mock 3	130401	mothur.org/MiSeqDevelopmentData.html	Kozich et al. 2013. Appl Environ Microbiol. 79:5112-20		247	259		NA	1012097	322786	13410	1610	307766	307720
39	Bacterial 16S rDNA	V4	Mock 3	130403	mothur.org/MiSeqDevelopmentData.html	Kozich et al. 2013. Appl Environ Microbiol. 79:5112-20		247	259		NA	1034938	443212	19101	2063	422048	421977
40	Bacterial 16S rDNA	V4	Mock 3	130417	mothur.org/MiSeqDevelopmentData.html	Kozich et al. 2013. Appl Environ Microbiol. 79:5112-20		247	259		NA	899146	422479	18348	1820	402311	402226
41	Bacterial 16S rDNA	V4	Mock 3	130422	mothur.org/MiSeqDevelopmentData.html	Kozich et al. 2013. Appl Environ Microbiol. 79:5112-20		247	259		NA	786991	410013	17851	1706	390456	390357
42	Bacterial 16S rDNA	V4	Mouse 1	130401	mothur.org/MiSeqDevelopmentData.html	Kozich et al. 2013. Appl Environ Microbiol. 79:5112-20		247	259		NA	1613839	342690	8529	0	334161	333775
43	Bacterial 16S rDNA	V4	Mouse 1	130403	mothur.org/MiSeqDevelopmentData.html	Kozich et al. 2013. Appl Environ Microbiol. 79:5112-20		247	259		NA	1632073	453909	11185	0	442724	442081
44	Bacterial 16S rDNA	V4	Mouse 1	130417	mothur.org/MiSeqDevelopmentData.html	Kozich et al. 2013. Appl Environ Microbiol. 79:5112-20		247	259		NA	1338731	345280	8560	0	336720	336188
45	Bacterial 16S rDNA	V4	Mouse 1	130422	mothur.org/MiSeqDevelopmentData.html	Kozich et al. 2013. Appl Environ Microbiol. 79:5112-20		247	259		NA	1135070	387184	9772	0	377412	376822
46	Bacterial 16S rDNA	V4	Mouse 2	130401	mothur.org/MiSeqDevelopmentData.html	Kozich et al. 2013. Appl Environ Microbiol. 79:5112-20		247	259		NA	1496238	387888	13710	0	374178	373853
47	Bacterial 16S rDNA	V4	Mouse 2	130403	mothur.org/MiSeqDevelopmentData.html	Kozich et al. 2013. Appl Environ Microbiol. 79:5112-20		247	259		NA	1521460	504469	18390	0	486079	485454
48	Bacterial 16S rDNA	V4	Mouse 2	130417	mothur.org/MiSeqDevelopmentData.html	Kozich et al. 2013. Appl Environ Microbiol. 79:5112-20		247	259		NA	1248159	381525	13819	0	367706	367235
49	Bacterial 16S rDNA	V4	Mouse 2	130422	mothur.org/MiSeqDevelopmentData.html	Kozich et al. 2013. Appl Environ Microbiol. 79:5112-20		247	259		NA	1057438	427295	15459	0	411836	411247
50	Bacterial 16S rDNA	V4	Mouse 3	130401	mothur.org/MiSeqDevelopmentData.html	Kozich et al. 2013. Appl Environ Microbiol. 79:5112-20		247	259		NA	945109	115469	2672	0	112797	112673
51	Bacterial 16S rDNA	V4	Mouse 3	130403	mothur.org/MiSeqDevelopmentData.html	Kozich et al. 2013. Appl Environ Microbiol. 79:5112-20		247	259		NA	1000948	162345	3954	0	158391	158184
52	Bacterial 16S rDNA	V4	Mouse 3	130417	mothur.org/MiSeqDevelopmentData.html	Kozich et al. 2013. Appl Environ Microbiol. 79:5112-20		247	259		NA	838618	126430	2880	0	123550	123364
53	Bacterial 16S rDNA	V4	Mouse 3	130422	mothur.org/MiSeqDevelopmentData.html	Kozich et al. 2013. Appl Environ Microbiol. 79:5112-20		247	259		NA	717784	142749	3547	0	139202	139007
54	Bacterial 16S rDNA	V4	Soil 1	130401	mothur.org/MiSeqDevelopmentData.html	Kozich et al. 2013. Appl Environ Microbiol. 79:5112-20		247	259		NA	960647	361483	13986	0	347497	347354
55	Bacterial 16S rDNA	V4	Soil 1	130403	mothur.org/MiSeqDevelopmentData.html	Kozich et al. 2013. Appl Environ Microbiol. 79:5112-20		247	259		NA	892801	371976	14451	0	357525	357375
56	Bacterial 16S rDNA	V4	Soil 1	130417	mothur.org/MiSeqDevelopmentData.html	Kozich et al. 2013. Appl Environ Microbiol. 79:5112-20		247	259		NA	765015	321308	12105	0	309203	309059
57	Bacterial 16S rDNA	V4	Soil 1	130422	mothur.org/MiSeqDevelopmentData.html	Kozich et al. 2013. Appl Environ Microbiol. 79:5112-20		247	259		NA	661045	295786	11543	0	284243	284107
58	Bacterial 16S rDNA	V4	Soil 2	130401	mothur.org/MiSeqDevelopmentData.html	Kozich et al. 2013. Appl Environ Microbiol. 79:5112-20		247	259		NA	922639	299443	15953	0	283490	283365
59	Bacterial 16S rDNA	V4	Soil 2	130403	mothur.org/MiSeqDevelopmentData.html	Kozich et al. 2013. Appl Environ Microbiol. 79:5112-20		247	259		NA	870540	306085	16318	0	289767	289625
60	Bacterial 16S rDNA	V4	Soil 2	130417	mothur.org/MiSeqDevelopmentData.html	Kozich et al. 2013. Appl Environ Microbiol. 79:5112-20		247	259		NA	743408	261204	13932	0	247272	247169
61	Bacterial 16S rDNA	V4	Soil 2	130422	mothur.org/MiSeqDevelopmentData.html	Kozich et al. 2013. Appl Environ Microbiol. 79:5112-20		247	259		NA	646592	240013	12874	0	227139	227018
62	Bacterial 16S rDNA	V4	Soil 3	130401	mothur.org/MiSeqDevelopmentData.html	Kozich et al. 2013. Appl Environ Microbiol. 79:5112-20		247	259		NA	897521	278256	10291	0	267965	267867
63	Bacterial 16S rDNA	V4	Soil 3	130403	mothur.org/MiSeqDevelopmentData.html	Kozich et al. 2013. Appl Environ Microbiol. 79:5112-20		247	259		NA	858937	295248	10995	0	284253	284152
64	Bacterial 16S rDNA	V4	Soil 3	130417	mothur.org/MiSeqDevelopmentData.html	Kozich et al. 2013. Appl Environ Microbiol. 79:5112-20		247	259		NA	745160	259096	9576	0	249520	249404
65	Bacterial 16S rDNA	V4	Soil 3	130422	mothur.org/MiSeqDevelopmentData.html	Kozich et al. 2013. Appl Environ Microbiol. 79:5112-20		247	259		NA	644867	238781	8891	0	229890	229764
66	Bacterial 16S rDNA	V4-V5	Mock 1	130401	mothur.org/MiSeqDevelopmentData.html	Kozich et al. 2013. Appl Environ Microbiol. 79:5112-20		367	382		NA	602819	52831	6668	195	45968	45951
67	Bacterial 16S rDNA	V4-V5	Mock 1	130403	mothur.org/MiSeqDevelopmentData.html	Kozich et al. 2013. Appl Environ Microbiol. 79:5112-20		367	382		NA	613352	113464	14568	328	98568	98498
68	Bacterial 16S rDNA	V4-V5	Mock 1	130417	mothur.org/MiSeqDevelopmentData.html	Kozich et al. 2013. Appl Environ Microbiol. 79:5112-20		367	382		NA	534938	100797	13123	336	87338	87277
69	Bacterial 16S rDNA	V4-V5	Mock 1	130422	mothur.org/MiSeqDevelopmentData.html	Kozich et al. 2013. Appl Environ Microbiol. 79:5112-20		367	382		NA	469501	144835	19457	396	124982	124911
70	Bacterial 16S rDNA	V4-V5	Mock 2	130401	mothur.org/MiSeqDevelopmentData.html	Kozich et al. 2013. Appl Environ Microbiol. 79:5112-20		367	382		NA	613091	63676	10145	501	53030	53003
71	Bacterial 16S rDNA	V4-V5	Mock 2	130403	mothur.org/MiSeqDevelopmentData.html	Kozich et al. 2013. Appl Environ Microbiol. 79:5112-20		367	382		NA	627320	145717	24546	899	120272	120179
72	Bacterial 16S rDNA	V4-V5	Mock 2	130417	mothur.org/MiSeqDevelopmentData.html	Kozich et al. 2013. Appl Environ Microbiol. 79:5112-20		367	382		NA	552729	131564	22001	907	108656	108574
73	Bacterial 16S rDNA	V4-V5	Mock 2	130422	mothur.org/MiSeqDevelopmentData.html	Kozich et al. 2013. Appl Environ Microbiol. 79:5112-20		367	382		NA	481735	188488	32343	941	155204	155115
74	Bacterial 16S rDNA	V4-V5	Mock 3	130401	mothur.org/MiSeqDevelopmentData.html	Kozich et al. 2013. Appl Environ Microbiol. 79:5112-20		367	382		NA	1012097	44141	6731	531	36879	36860
75	Bacterial 16S rDNA	V4-V5	Mock 3	130403	mothur.org/MiSeqDevelopmentData.html	Kozich et al. 2013. Appl Environ Microbiol. 79:5112-20		367	382		NA	1034938	125798	20280	1162	104356	104282
76	Bacterial 16S rDNA	V4-V5	Mock 3	130417	mothur.org/MiSeqDevelopmentData.html	Kozich et al. 2013. Appl Environ Microbiol. 79:5112-20		367	382		NA	899146	119044	19600	1140	98304	98234
77	Bacterial 16S rDNA	V4-V5	Mock 3	130422	mothur.org/MiSeqDevelopmentData.html	Kozich et al. 2013. Appl Environ Microbiol. 79:5112-20		367	382		NA	786991	188787	31760	1291	155736	155641
78	Fungal rDNA	ITS1	even	SRX3014766	ncbi.nlm.nih.gov/sra	Bakker. 2018. Mol Ecol Resour. 18:541-56		173	443		40910	21511	21935	513	0	21422	21422
79	Fungal rDNA	ITS1	even	SRX3014768	ncbi.nlm.nih.gov/sra	Bakker. 2018. Mol Ecol Resour. 18:541-56		173	443		24582	14689	15033	412	0	14621	14621
80	Fungal rDNA	ITS1	even	SRX3014769	ncbi.nlm.nih.gov/sra	Bakker. 2018. Mol Ecol Resour. 18:541-56		173	443		44533	28802	29446	786	0	28660	28660
81	Fungal rDNA	ITS1	staggered A	SRX3014779	ncbi.nlm.nih.gov/sra	Bakker. 2018. Mol Ecol Resour. 18:541-56		173	443		24348	13843	13957	178	0	13779	13779
82	Fungal rDNA	ITS1	staggered A	SRX3014784	ncbi.nlm.nih.gov/sra	Bakker. 2018. Mol Ecol Resour. 18:541-56		173	443		44884	19447	19602	202	0	19400	19400
83	Fungal rDNA	ITS1	staggered A	SRX3014785	ncbi.nlm.nih.gov/sra	Bakker. 2018. Mol Ecol Resour. 18:541-56		173	443		31605	15515	15668	186	0	15482	15482
84	Fungal rDNA	ITS1	staggered B	SRX3014790	ncbi.nlm.nih.gov/sra	Bakker. 2018. Mol Ecol Resour. 18:541-56		173	443		30784	21145	21320	231	0	21089	21089
85	Fungal rDNA	ITS1	staggered B	SRX3014791	ncbi.nlm.nih.gov/sra	Bakker. 2018. Mol Ecol Resour. 18:541-56		173	443		33865	21686	21927	276	0	21651	21651
86	Fungal rDNA	ITS1	staggered B	SRX3014792	ncbi.nlm.nih.gov/sra	Bakker. 2018. Mol Ecol Resour. 18:541-56		173	443		18041	11279	11392	149	0	11243	11243
87	Fungal rDNA	ITS2	even	SRX3014766	ncbi.nlm.nih.gov/sra	Bakker. 2018. Mol Ecol Resour. 18:541-56		195	519		40910	13935	14009	515	0	13494	13494
88	Fungal rDNA	ITS2	even	SRX3014768	ncbi.nlm.nih.gov/sra	Bakker. 2018. Mol Ecol Resour. 18:541-56		195	519		24582	4671	4686	127	0	4559	4559
89	Fungal rDNA	ITS2	even	SRX3014769	ncbi.nlm.nih.gov/sra	Bakker. 2018. Mol Ecol Resour. 18:541-56		195	519		44533	9538	9585	343	0	9242	9242
90	Fungal rDNA	ITS2	staggered A	SRX3014779	ncbi.nlm.nih.gov/sra	Bakker. 2018. Mol Ecol Resour. 18:541-56		195	519		24348	3143	3161	37	0	3124	3124
91	Fungal rDNA	ITS2	staggered A	SRX3014784	ncbi.nlm.nih.gov/sra	Bakker. 2018. Mol Ecol Resour. 18:541-56		195	519		44884	12932	12973	134	0	12839	12839
92	Fungal rDNA	ITS2	staggered A	SRX3014785	ncbi.nlm.nih.gov/sra	Bakker. 2018. Mol Ecol Resour. 18:541-56		195	519		31605	6024	6043	47	0	5996	5996
93	Fungal rDNA	ITS2	staggered B	SRX3014790	ncbi.nlm.nih.gov/sra	Bakker. 2018. Mol Ecol Resour. 18:541-56		195	519		30784	5560	5562	32	0	5530	5530
94	Fungal rDNA	ITS2	staggered B	SRX3014791	ncbi.nlm.nih.gov/sra	Bakker. 2018. Mol Ecol Resour. 18:541-56		195	519		33865	7607	7642	81	0	7561	7561
95	Fungal rDNA	ITS2	staggered B	SRX3014792	ncbi.nlm.nih.gov/sra	Bakker. 2018. Mol Ecol Resour. 18:541-56		195	519		18041	3380	3394	50	0	3344	3344
afastq_minmergelen and fastq_maxmergelen encompass length of reference sequences +/- 5 bp
bNA= reads were removed by authors prior to making them publicly available
cFor Fungal rDNA, reads at this step are a mixture of ITS1 and ITS2 regions, and the number specific a single region cannot be determined
dFor bacterial 16S rDNA, reads at this step are a mixture of V3-V4, V4, and V4-V5 regions, and the number specific a single region cannot be determined

## Sheet: Supplementary Table 2
Supplementary Table 2. Parameter values for DADA2 and retention of reads during its steps
						Parameter				Retention of reads
Sample number	Sequence type	Region	Sample type	Run or experiment		trunLen	minLen	maxEE		input	filtered	denoised	merged	tabled	nonchim
										Number of reads
1	Antibody mRNA	NA	NA	SRX1589582		c(250,228)a	NAb	c(2,2)c		308878	176792	176654	175471	175471	175040
2	Antibody mRNA	NA	NA	SRX1589583		c(250,228)a	NAb	c(2,2)c		398403	233098	232920	231028	231028	230314
3	Antibody mRNA	NA	NA	SRX1589584		c(250,228)a	NAb	c(2,2)c		349172	191252	191039	190722	190722	190315
4	Antibody mRNA	NA	NA	SRX1589585		c(250,228)a	NAb	c(2,2)c		425327	249076	248990	246925	246925	246293
5	Antibody mRNA	NA	NA	SRX1589587		c(250,228)a	NAb	c(2,2)c		379511	220557	220363	218696	218696	218087
6	Bacterial 16S rDNA	V3-V4	Mock 1	130401		c(240,240)d	NAb	c(2,5)e		39772	4470	4414	4183	4183	4183
7	Bacterial 16S rDNA	V3-V4	Mock 1	130403		c(240,240)d	NAb	c(2,5)e		34785	3103	3086	2900	2900	2900
8	Bacterial 16S rDNA	V3-V4	Mock 1	130417		c(240,240)d	NAb	c(2,5)e		26355	1939	1936	1757	1757	1757
9	Bacterial 16S rDNA	V3-V4	Mock 1	130422		c(240,240)d	NAb	c(2,5)e		22418	1665	1658	1656	1656	1656
10	Bacterial 16S rDNA	V3-V4	Mock 2	130401		c(240,240)d	NAb	c(2,5)e		32122	3810	3808	3421	3421	3421
11	Bacterial 16S rDNA	V3-V4	Mock 2	130403		c(240,240)d	NAb	c(2,5)e		28763	2638	2630	2436	2436	2436
12	Bacterial 16S rDNA	V3-V4	Mock 2	130417		c(240,240)d	NAb	c(2,5)e		22146	1660	1642	1545	1545	1545
13	Bacterial 16S rDNA	V3-V4	Mock 2	130422		c(240,240)d	NAb	c(2,5)e		19072	1455	1442	1437	1437	1437
14	Bacterial 16S rDNA	V3-V4	Mock 3	130401		c(240,240)d	NAb	c(2,5)e		23222	2031	2024	1933	1933	1933
15	Bacterial 16S rDNA	V3-V4	Mock 3	130403		c(240,240)d	NAb	c(2,5)e		21649	1538	1501	1412	1412	1412
16	Bacterial 16S rDNA	V3-V4	Mock 3	130417		c(240,240)d	NAb	c(2,5)e		16609	1031	1014	950	950	950
17	Bacterial 16S rDNA	V3-V4	Mock 3	130422		c(240,240)d	NAb	c(2,5)e		15198	1011	1008	968	968	968
18	Bacterial 16S rDNA	V4	Human 1	130401		c(240,160)f	NAb	c(2,2)f		337779	291024	290737	274215	274215	270901
19	Bacterial 16S rDNA	V4	Human 1	130403		c(240,160)f	NAb	c(2,2)f		397324	377446	377000	370025	370025	364565
20	Bacterial 16S rDNA	V4	Human 1	130417		c(240,160)f	NAb	c(2,2)f		354540	332478	332103	329368	329368	324565
21	Bacterial 16S rDNA	V4	Human 1	130422		c(240,160)f	NAb	c(2,2)f		320194	306218	305592	303445	303445	298910
22	Bacterial 16S rDNA	V4	Human 2	130401		c(240,160)f	NAb	c(2,2)f		474607	410754	410363	385665	385665	381546
23	Bacterial 16S rDNA	V4	Human 2	130403		c(240,160)f	NAb	c(2,2)f		561501	534124	533726	522841	522841	516155
24	Bacterial 16S rDNA	V4	Human 2	130417		c(240,160)f	NAb	c(2,2)f		504746	473954	473632	469175	469175	463343
25	Bacterial 16S rDNA	V4	Human 2	130422		c(240,160)f	NAb	c(2,2)f		453996	434484	434003	430726	430726	424718
26	Bacterial 16S rDNA	V4	Human 3	130401		c(240,160)f	NAb	c(2,2)f		283683	251838	251223	236982	236982	232750
27	Bacterial 16S rDNA	V4	Human 3	130403		c(240,160)f	NAb	c(2,2)f		370318	355775	355440	347399	347399	340684
28	Bacterial 16S rDNA	V4	Human 3	130417		c(240,160)f	NAb	c(2,2)f		340952	323703	323340	320309	320309	314219
29	Bacterial 16S rDNA	V4	Human 3	130422		c(240,160)f	NAb	c(2,2)f		314824	302520	302196	299758	299758	293819
30	Bacterial 16S rDNA	V4	Mock 1	130401		c(240,160)f	NAb	c(2,2)f		179604	152560	152474	144198	144198	142940
31	Bacterial 16S rDNA	V4	Mock 1	130403		c(240,160)f	NAb	c(2,2)f		220735	207253	207188	205998	205998	203972
32	Bacterial 16S rDNA	V4	Mock 1	130417		c(240,160)f	NAb	c(2,2)f		202259	187486	187337	187068	187068	185130
33	Bacterial 16S rDNA	V4	Mock 1	130422		c(240,160)f	NAb	c(2,2)f		191330	181234	181159	180915	180915	179038
34	Bacterial 16S rDNA	V4	Mock 2	130401		c(240,160)f	NAb	c(2,2)f		134927	115869	115771	110128	110128	109867
35	Bacterial 16S rDNA	V4	Mock 2	130403		c(240,160)f	NAb	c(2,2)f		167211	157632	157514	157333	157333	156524
36	Bacterial 16S rDNA	V4	Mock 2	130417		c(240,160)f	NAb	c(2,2)f		157334	146315	146284	146088	146088	145344
37	Bacterial 16S rDNA	V4	Mock 2	130422		c(240,160)f	NAb	c(2,2)f		147624	139911	139849	139767	139767	139054
38	Bacterial 16S rDNA	V4	Mock 3	130401		c(240,160)f	NAb	c(2,2)f		307766	271532	271248	255556	255556	247601
39	Bacterial 16S rDNA	V4	Mock 3	130403		c(240,160)f	NAb	c(2,2)f		422048	402202	401896	399017	399017	385180
40	Bacterial 16S rDNA	V4	Mock 3	130417		c(240,160)f	NAb	c(2,2)f		402311	377874	377454	376610	376610	363471
41	Bacterial 16S rDNA	V4	Mock 3	130422		c(240,160)f	NAb	c(2,2)f		390456	371870	371570	370504	370504	357630
42	Bacterial 16S rDNA	V4	Mouse 1	130401		c(240,160)f	NAb	c(2,2)f		334161	285758	285126	224976	224976	224135
43	Bacterial 16S rDNA	V4	Mouse 1	130403		c(240,160)f	NAb	c(2,2)f		442724	416177	415801	363396	363396	361464
44	Bacterial 16S rDNA	V4	Mouse 1	130417		c(240,160)f	NAb	c(2,2)f		336720	317442	317080	308688	308688	307031
45	Bacterial 16S rDNA	V4	Mouse 1	130422		c(240,160)f	NAb	c(2,2)f		377412	359823	359292	354982	354982	353373
46	Bacterial 16S rDNA	V4	Mouse 2	130401		c(240,160)f	NAb	c(2,2)f		374178	319379	318995	251112	251112	248977
47	Bacterial 16S rDNA	V4	Mouse 2	130403		c(240,160)f	NAb	c(2,2)f		486079	456260	455873	397143	397143	393525
48	Bacterial 16S rDNA	V4	Mouse 2	130417		c(240,160)f	NAb	c(2,2)f		367706	345970	345703	336450	336450	333729
49	Bacterial 16S rDNA	V4	Mouse 2	130422		c(240,160)f	NAb	c(2,2)f		411836	391569	391240	385884	385884	382666
50	Bacterial 16S rDNA	V4	Mouse 3	130401		c(240,160)f	NAb	c(2,2)f		112797	97874	97583	78441	78441	78319
51	Bacterial 16S rDNA	V4	Mouse 3	130403		c(240,160)f	NAb	c(2,2)f		158391	150107	149766	130225	130225	129911
52	Bacterial 16S rDNA	V4	Mouse 3	130417		c(240,160)f	NAb	c(2,2)f		123550	116697	116415	113071	113071	112782
53	Bacterial 16S rDNA	V4	Mouse 3	130422		c(240,160)f	NAb	c(2,2)f		139202	133156	132982	132462	132462	131958
54	Bacterial 16S rDNA	V4	Soil 1	130401		c(240,160)f	NAb	c(2,2)f		347497	284604	279376	254671	254671	245935
55	Bacterial 16S rDNA	V4	Soil 1	130403		c(240,160)f	NAb	c(2,2)f		357525	330703	325853	303058	303058	292297
56	Bacterial 16S rDNA	V4	Soil 1	130417		c(240,160)f	NAb	c(2,2)f		309203	284666	279894	262155	262155	253234
57	Bacterial 16S rDNA	V4	Soil 1	130422		c(240,160)f	NAb	c(2,2)f		284243	265639	261150	243999	243999	235388
58	Bacterial 16S rDNA	V4	Soil 2	130401		c(240,160)f	NAb	c(2,2)f		283490	231225	226023	203820	203820	197105
59	Bacterial 16S rDNA	V4	Soil 2	130403		c(240,160)f	NAb	c(2,2)f		289767	267569	262646	241633	241633	233079
60	Bacterial 16S rDNA	V4	Soil 2	130417		c(240,160)f	NAb	c(2,2)f		247272	227634	222841	206760	206760	199743
61	Bacterial 16S rDNA	V4	Soil 2	130422		c(240,160)f	NAb	c(2,2)f		227139	211916	207121	192123	192123	185463
62	Bacterial 16S rDNA	V4	Soil 3	130401		c(240,160)f	NAb	c(2,2)f		267965	223399	218930	196313	196313	189402
63	Bacterial 16S rDNA	V4	Soil 3	130403		c(240,160)f	NAb	c(2,2)f		284253	264189	259370	237992	237992	228858
64	Bacterial 16S rDNA	V4	Soil 3	130417		c(240,160)f	NAb	c(2,2)f		249520	231267	226783	210140	210140	202062
65	Bacterial 16S rDNA	V4	Soil 3	130422		c(240,160)f	NAb	c(2,2)f		229890	215462	211009	195627	195627	188417
66	Bacterial 16S rDNA	V4-V5	Mock 1	130401		c(240,177)g	NAb	c(2,2)f		45968	35131	35089	34127	34127	33317
67	Bacterial 16S rDNA	V4-V5	Mock 1	130403		c(240,177)g	NAb	c(2,2)f		98568	78772	78691	78404	78404	76127
68	Bacterial 16S rDNA	V4-V5	Mock 1	130417		c(240,177)g	NAb	c(2,2)f		87338	77135	77065	76185	76185	73820
69	Bacterial 16S rDNA	V4-V5	Mock 1	130422		c(240,177)g	NAb	c(2,2)f		124982	107280	107156	105126	105126	101593
70	Bacterial 16S rDNA	V4-V5	Mock 2	130401		c(240,177)g	NAb	c(2,2)f		53030	40153	40065	38997	38997	37716
71	Bacterial 16S rDNA	V4-V5	Mock 2	130403		c(240,177)g	NAb	c(2,2)f		120272	95874	95698	95129	95129	91167
72	Bacterial 16S rDNA	V4-V5	Mock 2	130417		c(240,177)g	NAb	c(2,2)f		108656	96525	96386	95477	95477	91196
73	Bacterial 16S rDNA	V4-V5	Mock 2	130422		c(240,177)g	NAb	c(2,2)f		155204	133449	133200	130630	130630	124062
74	Bacterial 16S rDNA	V4-V5	Mock 3	130401		c(240,177)g	NAb	c(2,2)f		36879	26526	26464	25857	25857	25155
75	Bacterial 16S rDNA	V4-V5	Mock 3	130403		c(240,177)g	NAb	c(2,2)f		104356	82056	81966	81481	81481	78377
76	Bacterial 16S rDNA	V4-V5	Mock 3	130417		c(240,177)g	NAb	c(2,2)f		98304	87274	87171	86258	86258	82574
77	Bacterial 16S rDNA	V4-V5	Mock 3	130422		c(240,177)g	NAb	c(2,2)f		155736	134892	134623	131996	131996	126060
78	Fungal rDNA	ITS1	even	SRX3014766		NAb	50h	c(2,2)h		21422	20407	20403	19680	19680	19422
79	Fungal rDNA	ITS1	even	SRX3014768		NAb	50h	c(2,2)h		14621	14005	13974	13285	13285	13121
80	Fungal rDNA	ITS1	even	SRX3014769		NAb	50h	c(2,2)h		28660	27259	27236	25758	25758	25357
81	Fungal rDNA	ITS1	staggered A	SRX3014779		NAb	50h	c(2,2)h		13779	13449	13436	12905	12905	12681
82	Fungal rDNA	ITS1	staggered A	SRX3014784		NAb	50h	c(2,2)h		19400	18935	18913	18073	18073	17966
83	Fungal rDNA	ITS1	staggered A	SRX3014785		NAb	50h	c(2,2)h		15482	15034	15034	14408	14408	14341
84	Fungal rDNA	ITS1	staggered B	SRX3014790		NAb	50h	c(2,2)h		21089	20546	20546	19778	19778	19729
85	Fungal rDNA	ITS1	staggered B	SRX3014791		NAb	50h	c(2,2)h		21651	20996	20996	20215	20215	20169
86	Fungal rDNA	ITS1	staggered B	SRX3014792		NAb	50h	c(2,2)h		11243	10907	10898	10509	10509	10470
87	Fungal rDNA	ITS2	even	SRX3014766		NAb	50h	c(2,2)h		13494	12842	12830	12773	12773	10883
88	Fungal rDNA	ITS2	even	SRX3014768		NAb	50h	c(2,2)h		4559	4331	4326	4315	4315	4163
89	Fungal rDNA	ITS2	even	SRX3014769		NAb	50h	c(2,2)h		9242	8655	8653	8543	8543	7719
90	Fungal rDNA	ITS2	staggered A	SRX3014779		NAb	50h	c(2,2)h		3124	2916	2911	2873	2873	2768
91	Fungal rDNA	ITS2	staggered A	SRX3014784		NAb	50h	c(2,2)h		12839	12004	11966	11958	11958	11021
92	Fungal rDNA	ITS2	staggered A	SRX3014785		NAb	50h	c(2,2)h		5996	5487	5484	5474	5474	5234
93	Fungal rDNA	ITS2	staggered B	SRX3014790		NAb	50h	c(2,2)h		5530	5118	5103	5076	5076	4878
94	Fungal rDNA	ITS2	staggered B	SRX3014791		NAb	50h	c(2,2)h		7561	6795	6794	6775	6775	6310
95	Fungal rDNA	ITS2	staggered B	SRX3014792		NAb	50h	c(2,2)h		3344	2986	2973	2943	2943	2839
aFirst value (250) uses same trim length (10 bp) as for tutorial for V4 region; second value (228) is minimum needed to preserve 20 bp overlap (recommended by tutorial), given longest reference sequence is 438 bp
bNo value assigned
cValues recommended by tutorial for V4 (benjjneb.github.io/dada2/tutorial.html) and ITS regions (benjjneb.github.io/dada2/ITS_workflow.html)
dFirst value (240) is recommended by tutorial for V4 region (benjjneb.github.io/dada2/tutorial.html); second value (240) is minimum needed to preserve 20 bp overlap (recommended by tutorial), given longest reference sequence is 430 bp
eValues recommended by tutorial for V4 region (benjjneb.github.io/dada2/tutorial.html) when "few reads are passing the filter"
fValues recommended by tutorial for V4 region (benjjneb.github.io/dada2/tutorial.html)
gFirst value (240) is recommended by tutorial for V4 region (benjjneb.github.io/dada2/tutorial.html); second value (177) is minimum needed to preserve 20 bp overlap (recommended by tutorial), given longest reference sequence is 377 bp
hValues recommended by tutorial for ITS regions (benjjneb.github.io/dada2/ITS_workflow.html)

## Sheet: Supplementary Table 3
Supplementry Table 3. Parameter values for Deblur and retention of reads during its steps
						Parameter		Retention of reads
Sample number	Sequence type	Region	Sample type	Run or experiment		p-trim-length		total-input-reads	total-retained-reads	reads-truncatedc	reads-too-short-after-truncation	reads-exceeding-maximum-ambiguous-bases	reads-raw	unique-reads-derep	reads-derep	unique-reads-deblur	reads-deblur	unique-reads-hit-artifact	reads-hit-artifact	unique-reads-chimeric	reads-chimeric	unique-reads-hit-reference	reads-hit-reference	unique-reads-missed-reference	reads-missed-reference
								Number of reads
1	Antibody mRNA	NA	NA	SRX1589582		414b		308043	306769	1274	1274	0	306769	9205	262109	20	183723	0	0	1	24	17	183695	0	0
2	Antibody mRNA	NA	NA	SRX1589583		414b		397398	395767	1631	1631	0	395767	10897	340817	29	239278	0	0	0	0	18	239248	0	0
3	Antibody mRNA	NA	NA	SRX1589584		414b		348304	346772	1532	1532	0	346772	10179	293151	20	202524	0	0	0	0	16	202515	0	0
4	Antibody mRNA	NA	NA	SRX1589585		414b		424276	422595	1681	1681	0	422595	11348	365098	26	256239	0	0	4	31	17	256194	0	0
5	Antibody mRNA	NA	NA	SRX1589587		414b		378612	377147	1465	1465	0	377147	10563	324919	27	227395	0	0	1	3	20	227374	0	0
6	Bacterial 16S rDNA	V3-V4	Mock 1	130401		404b		39758	38978	11	4	11	38978	1725	13965	27	5211	0	0	0	0	24	5206	0	0
7	Bacterial 16S rDNA	V3-V4	Mock 1	130403		404b		34773	34764	8	1	12	34764	1616	19021	28	9109	0	0	0	0	23	9102	0	0
8	Bacterial 16S rDNA	V3-V4	Mock 1	130417		404b		26343	26328	0	0	343	26328	1305	14936	27	7013	0	0	1	2	23	7007	0	0
9	Bacterial 16S rDNA	V3-V4	Mock 1	130422		404b		22401	22380	10	1	19	22380	1105	14079	38	6588	0	0	2	29	29	6549	0	0
10	Bacterial 16S rDNA	V3-V4	Mock 2	130401		404b		32108	31488	2	2	7	31488	1267	9750	26	3828	0	0	0	0	24	3826	0	0
11	Bacterial 16S rDNA	V3-V4	Mock 2	130403		404b		28750	28743	2	2	618	28743	1365	14779	26	6924	0	0	0	0	24	6920	0	0
12	Bacterial 16S rDNA	V3-V4	Mock 2	130417		404b		22137	22124	3	0	7	22124	1085	11903	24	5634	0	0	1	3	22	5624	0	0
13	Bacterial 16S rDNA	V3-V4	Mock 2	130422		404b		19067	19061	0	0	1	19061	929	11464	35	5471	0	0	0	0	28	5459	0	0
14	Bacterial 16S rDNA	V3-V4	Mock 3	130401		404b		23186	22843	0	0	780	22843	762	4909	23	1607	0	0	0	0	20	1603	0	0
15	Bacterial 16S rDNA	V3-V4	Mock 3	130403		404b		21616	21615	3	3	18	21615	1013	10804	24	4770	0	0	0	0	23	4767	0	0
16	Bacterial 16S rDNA	V3-V4	Mock 3	130417		404b		16585	16565	3	3	3	16565	791	9088	24	3951	0	0	1	1	21	3942	0	0
17	Bacterial 16S rDNA	V3-V4	Mock 3	130422		404b		15166	15157	1	1	8	15157	720	9772	30	4361	0	0	2	20	28	4341	0	0
18	Bacterial 16S rDNA	V4	Human 1	130401		252b		337742	337323	0	0	419	337323	4975	319407	286	251789	0	0	6	27	256	251715	0	0
19	Bacterial 16S rDNA	V4	Human 1	130403		252b		397241	397121	0	0	19	397121	5766	380044	322	304898	0	0	10	28	276	304792	0	0
20	Bacterial 16S rDNA	V4	Human 1	130417		252b		354482	354383	0	0	161	354383	4861	342572	335	281384	0	0	13	46	275	281249	0	0
21	Bacterial 16S rDNA	V4	Human 1	130422		252b		320117	320098	0	0	97	320098	4702	311046	339	257801	0	0	12	29	274	257659	0	0
22	Bacterial 16S rDNA	V4	Human 2	130401		252b		474551	473923	0	0	99	473923	6476	450844	299	354326	0	0	7	23	275	354272	0	0
23	Bacterial 16S rDNA	V4	Human 2	130403		252b		561387	561220	0	0	167	561220	7471	538944	360	432190	0	0	14	42	286	432028	0	0
24	Bacterial 16S rDNA	V4	Human 2	130417		252b		504642	504481	0	0	323	504481	6184	489245	344	402012	0	0	10	32	283	401873	0	0
25	Bacterial 16S rDNA	V4	Human 2	130422		252b		453886	453842	0	0	115	453842	6097	442094	371	366498	0	0	16	53	292	366316	0	0
26	Bacterial 16S rDNA	V4	Human 3	130401		252b		283641	283318	0	0	120	283318	4061	269069	273	211416	0	0	8	21	239	211350	0	0
27	Bacterial 16S rDNA	V4	Human 3	130403		252b		370245	370148	0	0	628	370148	4949	355121	314	284898	0	0	14	63	262	284764	0	0
28	Bacterial 16S rDNA	V4	Human 3	130417		252b		340888	340773	0	0	44	340773	4321	330388	326	271225	0	0	23	84	262	271061	0	0
29	Bacterial 16S rDNA	V4	Human 3	130422		252b		314761	314744	0	0	17	314744	4174	306657	343	254460	0	0	15	62	266	254269	0	0
30	Bacterial 16S rDNA	V4	Mock 1	130401		252b		179581	179347	0	0	61	179347	4231	168954	32	138648	0	0	2	5	29	138641	0	0
31	Bacterial 16S rDNA	V4	Mock 1	130403		252b		220696	220635	0	0	164	220635	5123	210236	37	177380	0	0	4	11	29	177362	0	0
32	Bacterial 16S rDNA	V4	Mock 1	130417		252b		202213	202159	0	0	362	202159	4344	194950	35	170199	0	0	4	15	28	170180	0	0
33	Bacterial 16S rDNA	V4	Mock 1	130422		252b		191281	191264	0	0	96	191264	4282	185019	41	162591	0	0	7	23	29	162555	0	0
34	Bacterial 16S rDNA	V4	Mock 2	130401		252b		134906	134742	0	0	234	134742	3419	126275	30	104645	0	0	2	4	28	104641	0	0
35	Bacterial 16S rDNA	V4	Mock 2	130403		252b		167178	167136	0	0	17	167136	4066	158366	34	135007	0	0	3	5	27	134993	0	0
36	Bacterial 16S rDNA	V4	Mock 2	130417		252b		157296	157246	0	0	50	157246	3652	150998	36	132726	0	0	6	13	30	132713	0	0
37	Bacterial 16S rDNA	V4	Mock 2	130422		252b		147593	147590	0	0	3	147590	3444	142183	35	125938	0	0	2	4	30	125926	0	0
38	Bacterial 16S rDNA	V4	Mock 3	130401		252b		307720	307358	0	0	54	307358	6559	290593	38	229846	0	0	11	36	23	229802	0	0
39	Bacterial 16S rDNA	V4	Mock 3	130403		252b		421977	421881	0	0	42	421881	8182	403960	47	330494	0	0	11	65	26	330411	0	0
40	Bacterial 16S rDNA	V4	Mock 3	130417		252b		402226	402137	0	0	89	402137	7307	390037	47	330062	0	0	11	65	28	329982	0	0
41	Bacterial 16S rDNA	V4	Mock 3	130422		252b		390357	390330	0	0	27	390330	7344	379408	52	323150	0	0	11	77	27	323043	0	0
42	Bacterial 16S rDNA	V4	Mouse 1	130401		252b		333775	333322	0	0	997	333322	5775	317886	360	262410	0	0	1	4	326	262337	0	0
43	Bacterial 16S rDNA	V4	Mouse 1	130403		252b		442081	441964	0	0	129	441964	7112	425358	397	354982	0	0	3	10	334	354835	0	0
44	Bacterial 16S rDNA	V4	Mouse 1	130417		252b		336188	335191	0	0	141	335191	5556	325254	382	278186	0	0	1	1	321	278054	0	0
45	Bacterial 16S rDNA	V4	Mouse 1	130422		252b		376822	376784	0	0	324	376784	5929	367472	382	315827	0	0	0	0	315	315677	0	0
46	Bacterial 16S rDNA	V4	Mouse 2	130401		252b		373853	373366	0	0	487	373366	6167	356985	341	294307	0	0	2	14	317	294242	0	0
47	Bacterial 16S rDNA	V4	Mouse 2	130403		252b		485454	485325	0	0	34	485325	7440	468067	375	390069	0	0	3	24	323	389942	0	0
48	Bacterial 16S rDNA	V4	Mouse 2	130417		252b		367235	366215	0	0	37	366215	5703	356060	366	303046	0	0	3	24	318	302920	0	0
49	Bacterial 16S rDNA	V4	Mouse 2	130422		252b		411247	411213	0	0	9	411213	6215	401573	378	343277	0	0	4	15	311	343122	0	0
50	Bacterial 16S rDNA	V4	Mouse 3	130401		252b		112673	112532	0	0	453	112532	2733	104929	316	87772	0	0	1	7	291	87715	0	0
51	Bacterial 16S rDNA	V4	Mouse 3	130403		252b		158184	158147	0	0	117	158147	3510	149926	331	126570	0	0	3	8	287	126473	0	0
52	Bacterial 16S rDNA	V4	Mouse 3	130417		252b		123364	123040	0	0	38	123040	2662	117491	360	101513	0	0	1	4	299	101389	0	0
53	Bacterial 16S rDNA	V4	Mouse 3	130422		252b		139007	138998	0	0	1020	138998	2945	133937	342	116272	0	0	3	4	294	116173	0	0
54	Bacterial 16S rDNA	V4	Soil 1	130401		252b		347354	346919	0	0	374	346919	16477	289985	7365	196590	0	0	122	1085	6212	193181	20	141
55	Bacterial 16S rDNA	V4	Soil 1	130403		252b		357375	357295	0	0	27	357295	17299	306666	7780	211245	0	0	157	1232	6373	207168	20	151
56	Bacterial 16S rDNA	V4	Soil 1	130417		252b		309059	309049	0	0	2	309049	15732	273396	7634	190810	0	0	167	1274	6191	186683	20	172
57	Bacterial 16S rDNA	V4	Soil 1	130422		252b		284107	284078	0	0	29	284078	16443	256011	7724	177093	0	0	184	1233	6077	172635	19	135
58	Bacterial 16S rDNA	V4	Soil 2	130401		252b		283365	282991	0	0	80	282991	14759	233894	7125	159510	0	0	115	739	5973	156408	16	114
59	Bacterial 16S rDNA	V4	Soil 2	130403		252b		289625	289544	0	0	9	289544	15810	246711	7672	170657	0	0	187	865	6092	166690	16	101
60	Bacterial 16S rDNA	V4	Soil 2	130417		252b		247169	247160	0	0	53	247160	14422	217348	7396	151513	0	0	194	976	5802	147426	15	82
61	Bacterial 16S rDNA	V4	Soil 2	130422		252b		227018	226991	0	0	10	226991	15104	203855	7639	140879	0	0	209	930	5736	136357	13	95
62	Bacterial 16S rDNA	V4	Soil 3	130401		252b		267867	267510	0	0	435	267510	13918	220321	6820	149291	0	0	102	683	5800	146619	13	82
63	Bacterial 16S rDNA	V4	Soil 3	130403		252b		284152	284099	0	0	81	284099	14801	241666	7250	166918	0	0	115	733	5926	163446	14	94
64	Bacterial 16S rDNA	V4	Soil 3	130417		252b		249404	249402	0	0	357	249402	13632	219236	7159	152576	0	0	129	807	5806	149113	14	88
65	Bacterial 16S rDNA	V4	Soil 3	130422		252b		229764	229750	0	0	14	229750	14218	205675	7192	141944	0	0	146	673	5651	138315	11	56
66	Bacterial 16S rDNA	V4-V5	Mock 1	130401		372b		45951	44215	39	0	76	44215	2047	24716	29	11583	0	0	3	5	25	11577	0	0
67	Bacterial 16S rDNA	V4-V5	Mock 1	130403		372b		98498	98466	1	1	1947	98466	4171	62297	32	31220	0	0	5	15	23	31196	0	0
68	Bacterial 16S rDNA	V4-V5	Mock 1	130417		372b		87277	87201	13	13	80	87201	3654	63645	31	36438	0	0	3	12	24	36418	0	0
69	Bacterial 16S rDNA	V4-V5	Mock 1	130422		372b		124911	124850	0	0	26	124850	5039	91518	41	53611	0	0	5	15	24	53569	0	0
70	Bacterial 16S rDNA	V4-V5	Mock 2	130401		372b		53003	51055	1	1	31	51055	2359	28273	30	12870	0	0	4	8	24	12860	0	0
71	Bacterial 16S rDNA	V4-V5	Mock 2	130403		372b		120179	120140	6	2	37	120140	5194	76022	40	36918	0	0	4	8	28	36894	0	0
72	Bacterial 16S rDNA	V4-V5	Mock 2	130417		372b		108574	108437	28	0	73	108437	4539	79581	42	44763	0	0	5	18	25	44719	0	0
73	Bacterial 16S rDNA	V4-V5	Mock 2	130422		372b		155115	155022	11	10	87	155022	6285	114063	65	65354	0	0	5	36	25	65243	0	0
74	Bacterial 16S rDNA	V4-V5	Mock 3	130401		372b		36860	35818	0	0	1736	35818	1702	17379	25	7645	0	0	1	2	23	7642	0	0
75	Bacterial 16S rDNA	V4-V5	Mock 3	130403		372b		104282	104256	11	11	50	104256	4494	63554	34	30624	0	0	5	12	26	30606	0	0
76	Bacterial 16S rDNA	V4-V5	Mock 3	130417		372b		98234	98161	61	0	137	98161	4201	70440	40	39124	0	0	5	26	27	39083	0	0
77	Bacterial 16S rDNA	V4-V5	Mock 3	130422		372b		155641	155544	0	0	1042	155544	6324	113876	62	65254	0	0	4	17	27	65170	0	0
78	Fungal rDNA	ITS1	even	SRX3014766		178b		21422	21422	0	0	0	21422	298	20446	24	18900	0	0	2	40	21	18183	1	677
79	Fungal rDNA	ITS1	even	SRX3014768		178b		14621	14621	0	0	0	14621	183	13873	22	12898	0	0	1	14	20	12533	1	351
80	Fungal rDNA	ITS1	even	SRX3014769		178b		28660	28660	0	0	0	28660	365	27487	24	25425	0	0	1	46	21	24393	1	983
81	Fungal rDNA	ITS1	staggered A	SRX3014779		178b		13779	13779	0	0	0	13779	253	13280	15	12256	0	0	1	18	13	12229	1	9
82	Fungal rDNA	ITS1	staggered A	SRX3014784		178b		19400	19400	0	0	0	19400	269	18962	15	17929	0	0	1	8	13	17894	1	27
83	Fungal rDNA	ITS1	staggered A	SRX3014785		178b		15482	15482	0	0	0	15482	204	15099	14	14357	0	0	0	0	13	14320	1	37
84	Fungal rDNA	ITS1	staggered B	SRX3014790		178b		21089	21089	0	0	0	21089	310	20613	18	19449	0	0	0	0	17	19403	1	46
85	Fungal rDNA	ITS1	staggered B	SRX3014791		178b		21651	21651	0	0	0	21651	312	21190	17	20030	0	0	0	0	16	19971	1	59
86	Fungal rDNA	ITS1	staggered B	SRX3014792		178b		11243	11243	0	0	0	11243	159	10912	16	10372	0	0	2	11	13	10345	1	16
87	Fungal rDNA	ITS2	even	SRX3014766		200b		13494	13494	0	0	0	13494	277	12553	25	10572	0	0	4	40	16	10518	0	0
88	Fungal rDNA	ITS2	even	SRX3014768		200b		4559	4559	0	0	0	4559	95	4169	20	3741	0	0	3	3	16	3736	0	0
89	Fungal rDNA	ITS2	even	SRX3014769		200b		9242	9242	0	0	0	9242	175	8505	21	7348	0	0	3	24	16	7319	0	0
90	Fungal rDNA	ITS2	staggered A	SRX3014779		200b		3124	3124	0	0	0	3124	42	2912	16	2802	0	0	2	2	14	2800	0	0
91	Fungal rDNA	ITS2	staggered A	SRX3014784		200b		12839	12839	0	0	0	12839	191	12263	19	11403	0	0	4	13	15	11390	0	0
92	Fungal rDNA	ITS2	staggered A	SRX3014785		200b		5996	5996	0	0	0	5996	74	5643	16	5398	0	0	2	3	14	5395	0	0
93	Fungal rDNA	ITS2	staggered B	SRX3014790		200b		5530	5530	0	0	0	5530	97	5147	15	4736	0	0	0	0	14	4735	0	0
94	Fungal rDNA	ITS2	staggered B	SRX3014791		200b		7561	7561	0	0	0	7561	105	7145	14	6623	0	0	0	0	14	6623	0	0
95	Fungal rDNA	ITS2	staggered B	SRX3014792		200b		3344	3344	0	0	0	3344	63	3109	15	2876	0	0	0	0	14	2874	0	0
aNot processed
bLength of shortest reference sequence and length to which reads were trimmed (truncated) before Deblur
cWe confirmed reads were truncated to appropriate length; it is unknown why Deblur still truncated reads

## Sheet: Supplementary Table 4
Supplementary Table 4. Definition of terms in eq. [7] and [8] (and related terms)
		Original (prior) condition		Observed (posterior) condition
Term1,2	Expression	Identical or different?		Identical or different?	Error (change) in X[k]	Error (change) in Y[k]
P(α)[k]	(1 - px[k])(1 - py[k])	X[k] and Y[k] different		X[k] and Y[k] different	-	-
P(β)[k]	2/3 px[k](1 - py[k])				+	-
P(γ)[k]	2/3 (1 - px[k])py[k]				-	+
P(δ)[k]	7/9 px[k] × py[k]				+	+
P(ε)[k]	0			X[k] and Y[k] identical	-	-
P(ζ)[k]	1/3 px[k])(1 - py[k])				+	-
P(η)[k]	1/3 (1 - px[k])py[k]				-	+
P(θ)[k]	2/9 px[k] × py[k]				+	+
P(Α)[k]	0	X[k] and Y[k] identical		X[k] and Y[k] different	-	-
P(Β)[k]	px[k](1 - py[k])				+	-
P(Γ)[k]	(1 - px[k])py[k]				-	+
P(Δ)[k]	2/3 px[k] × py[k]				+	+
P(Ε)[k]	(1 - px[k])(1 - py[k])			X[k] and Y[k] identical	-	-
P(Ζ)[k]	0				+	-
P(Η)[k]	0				-	+
P(Θ)[k]	1/3 px[k] × py[k]				+	+
1As expected, P(α)[k] + P(β)[k] + P(γ)[k] + P(δ)[k] + P(ε)[k] + P(ζ)[k] + P(η)[k] + P(θ)[k] = 1
2As expected, P(Α)[k] + P(β)[k] + P(Γ)[k] + P(Δ)[k] + P(Ε)[k] + P(Ζ)[k] + P(Η)[k] + P(Θ)[k] = 1
